# Supplementary material for: Void-assisted plasticity in Ag nanowires with a single twin structure
Source: Royal Society of Chemistry journal article supplement (doi:10.1039/c3nr04731h), 2014-07-09
Supplement: c3nr04731h1.pdf [file c3nr04731h1.pdf]

## Electronic Supplementary Information (ESI) for *Nanoscale*

### Void-assisted plasticity in Ag nanowires with a single twin structure

He Zheng,<sup>ab</sup> Jiangwei Wang,<sup>a</sup> Jian Yu Huang,<sup>c</sup> Jianbo Wang,<sup>\*a</sup> and Scott X. Mao<sup>\*b</sup>

<sup>a</sup> School of Physics and Technology, Center for Electron Microscopy and MOE Key Laboratory of Artificial Micro- and Nano-structures, Wuhan University, Wuhan 430072, China. Fax: +86-27-6875-2569; Tel: +86-27-6875-2481 ext. 8132; E-mail: [wang@whu.edu.cn](mailto:wang@whu.edu.cn)

<sup>b</sup> Department of Mechanical Engineering & Materials Science, University of Pittsburgh, Pittsburgh, PA 15261, USA. E-mail: [smao@engr.pitt.edu](mailto:smao@engr.pitt.edu)

<sup>c</sup> 8915 Hampton Ave NE, Albuquerque, NM 87122, USA.

#### INFORMATION ABOUT ELECTRONIC SUPPLEMENTARY MATERIAL.

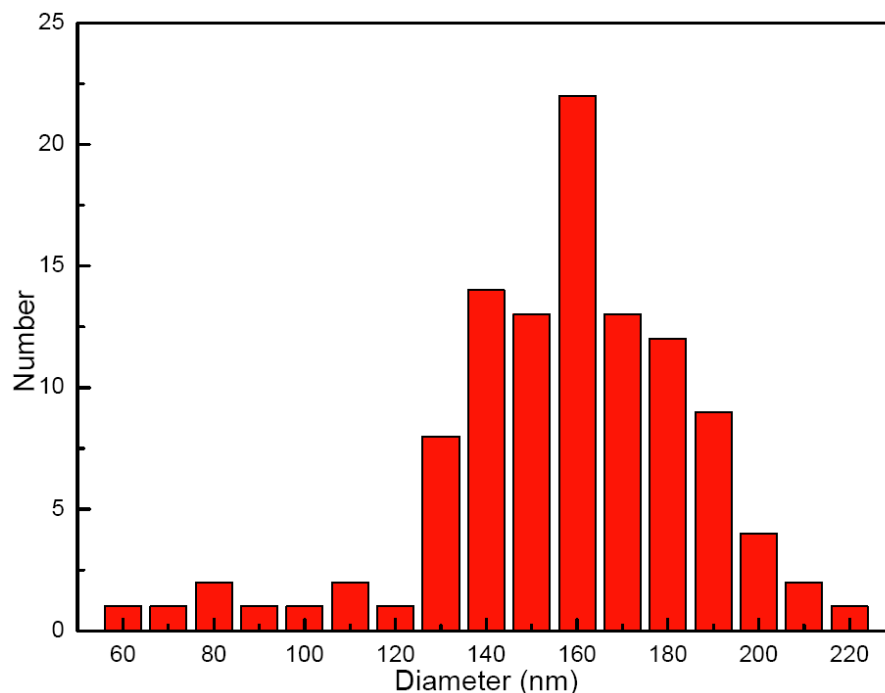

**Figure S1.** The statistic diameter distribution of Ag nanowires.

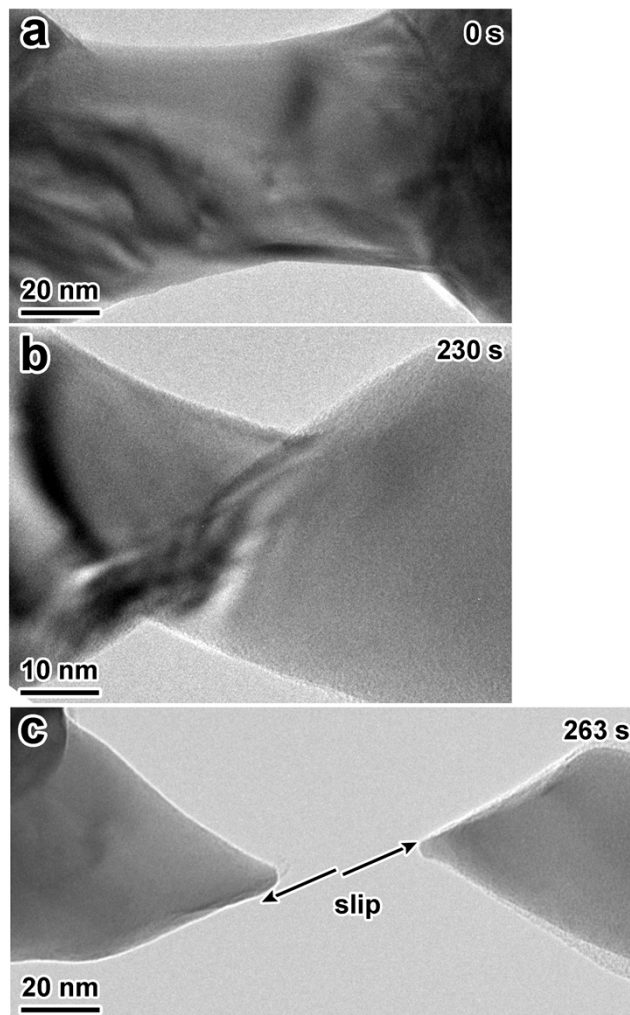

**Figure S2.** (a-c) Time-lapsed images showing the uniaxial tensile loading of an individual Ag NW without TB. The displacement rate is approximately 0.04 nm/s.

**Movie M1:** In-situ recorded deformation dynamics of an individual Ag NW under tensile stress, recorded at 2 frames/sec and played at 10× speed.

**Movie M2:** Real time video showing the emission of partial dislocations from the free surface, recorded at 2 frames/sec and played at 10× speed.

**Movie M3:** The void nucleation and propagation before the NW fractured, recorded at 2 frames/sec and played at 10× speed.
